# Supplementary material for: Enhanced field-emission properties of buckled α-borophene by means of Li decoration: a first-principles investigation
Source: Royal Society of Chemistry journal article supplement (doi:10.1039/c8cp01048j), 2018-01-01
Supplement: c8cp01048j1.pdf [file c8cp01048j1.pdf]

## Supplementary Information for:

# Enhanced field-emission properties of buckled $\alpha$ -borophene by Li decoration: A first-principles investigation

Bing Zheng,<sup>a</sup> Liang Qiao,<sup>b</sup> Hai-tao Yu,<sup>\*a</sup> Qi-yue Wang,<sup>a</sup> Ying Xie,<sup>a</sup> and Chao-qun Qu,<sup>\*c</sup>

<sup>a</sup>Key Laboratory of Functional Inorganic Material Chemistry (Ministry of Education) and School of Chemistry and Materials Science, Heilongjiang University, Harbin 150080, P. R. China. E-mail: yuhaitao@hlju.edu.cn

<sup>b</sup>College of Science and Key Laboratory of Materials Design and Quantum Simulation, Changchun University, Changchun 130022, P. R. China

<sup>c</sup>Key Laboratory of Functional Materials Physics and Chemistry (Ministry of Education), Jilin Normal University, Changchun 130103, P. R. China. E-mail: quchaoqun@jlnu.edu.cn

## Theoretical details for calculating field emission current:

The Penn-Plummer model was adopted for DFT calculations for the computation of the field-emission currents.<sup>1</sup> In DFT calculations, the supercell is generally discretized by introducing a fine grid. This grid divides the supercell face perpendicular to the emission direction into small surface elements. The emission current  $I_i$  was calculated along individual grid lines parallel to the emission direction. The currents  $I_i(\omega)$  can be expressed as<sup>1-3</sup>

$$I_i(\omega) = \frac{2e\hbar}{m_e} f(\omega) S_i \lambda_i^{-2}(\omega) D_i^2(\omega) g_i(\omega, x_{l,i}) \quad (1)$$

in which  $m_e$  is the electron effective mass,  $f(\omega)$  is the Fermi-Dirac distribution, and  $S_i$  is the area of the surface element  $i$ .  $\lambda_i(\omega)$  is a slowly varying function of the energy resulting from the asymptotic matching of the wave function of emitting state at the left turning point  $x_{l,i}$  with WKB wave function inside the barrier. The left and right turning points,  $x_{l,i}$  and  $x_{r,i}$ , along the grid line  $i$  are determined as the points where the energy of the emitting state becomes equal with the potential energy barrier  $u_i(x)$ , with  $x$  being the coordinate along the emission direction.  $D_i^2(\omega)$  indicates the probability of electron tunneling through the nanostructure-vacuum barrier  $u_i(x)$ , and  $g_i(\omega, x_{l,i})$  is the local density of states (LDOS) at the left turning point.  $\lambda_i(\omega)$  is given by

$$\lambda_i(\omega) = (\pi/3)^{1/2} (c_i/3)^{-1/3} [\Gamma(2/3) \cos(\pi/6)]^{-1} \quad (2)$$

In eq. (2),  $c_i$  is obtained by fitting  $(2m_e/\hbar^2)(u_i(x) - \omega)$  to  $c_i^2(x - x_{l,i})$  at the left turning point. The tunneling probability  $D_i^2(\omega)$  is given by

$$D_i^2(\omega) = \exp \left[ -2 \sqrt{\frac{2m_e}{\hbar}} \int_{x_{l,i}}^{x_{r,i}} \sqrt{u_i(x) - \omega} dx \right] \quad (3)$$

Actually, the emission current  $I_i(\omega)$  was obtained based the necessary data (LDOS,  $u_i(x)$ , and  $g_i(\omega, x_{l,i})$ ), which have been calculated by DMol<sup>3</sup>.

## REFERENCES

1. D. R. Penn and E. W. Plummer, *Phys. Rev. B*, 1974, **9**, 1216–1222.
2. D. R. Penn, *Phys. Rev. B*, 1976, **14**, 849–853.
3. M. Khazaei, A. A. Farajian and Y. Kawazoe, *Phys. Rev. Lett.*, 2005, **95**, 177602.

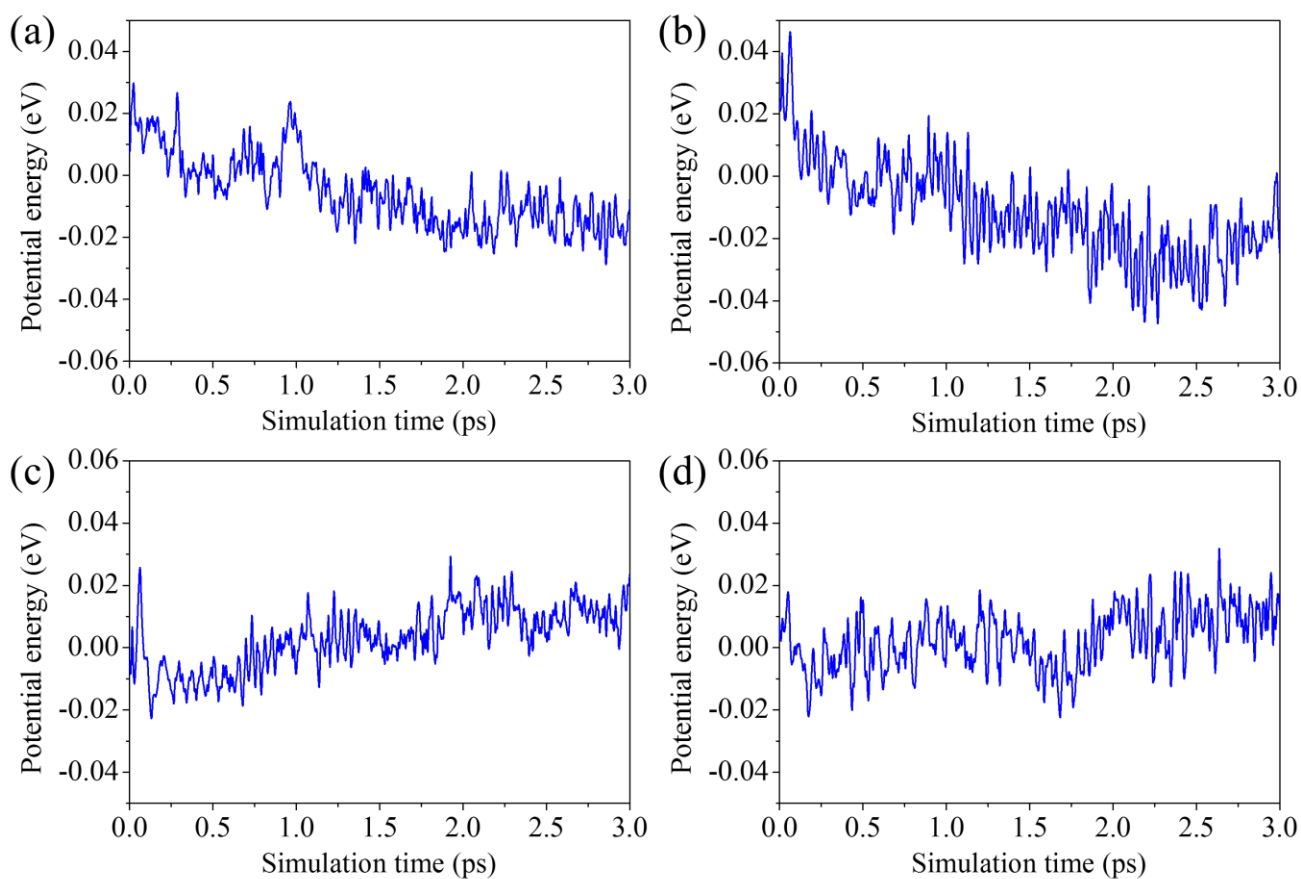

**Fig. S1.** Constant T simulation of  $\text{Li}_n/\text{BBP}$  ( $n = 1 \sim 4$ ) using the Nosé-Hoover chain thermostat, with 1.5 fs time step, target temperature 300 K, nose Q ratio = 2.0. (a) ~ (d) show the potential energies of Li/BBP, Li<sub>2</sub>/BBP, Li<sub>3</sub>/BBP and Li<sub>4</sub>/BBP at each time step of the simulation within 3 ps, respectively.

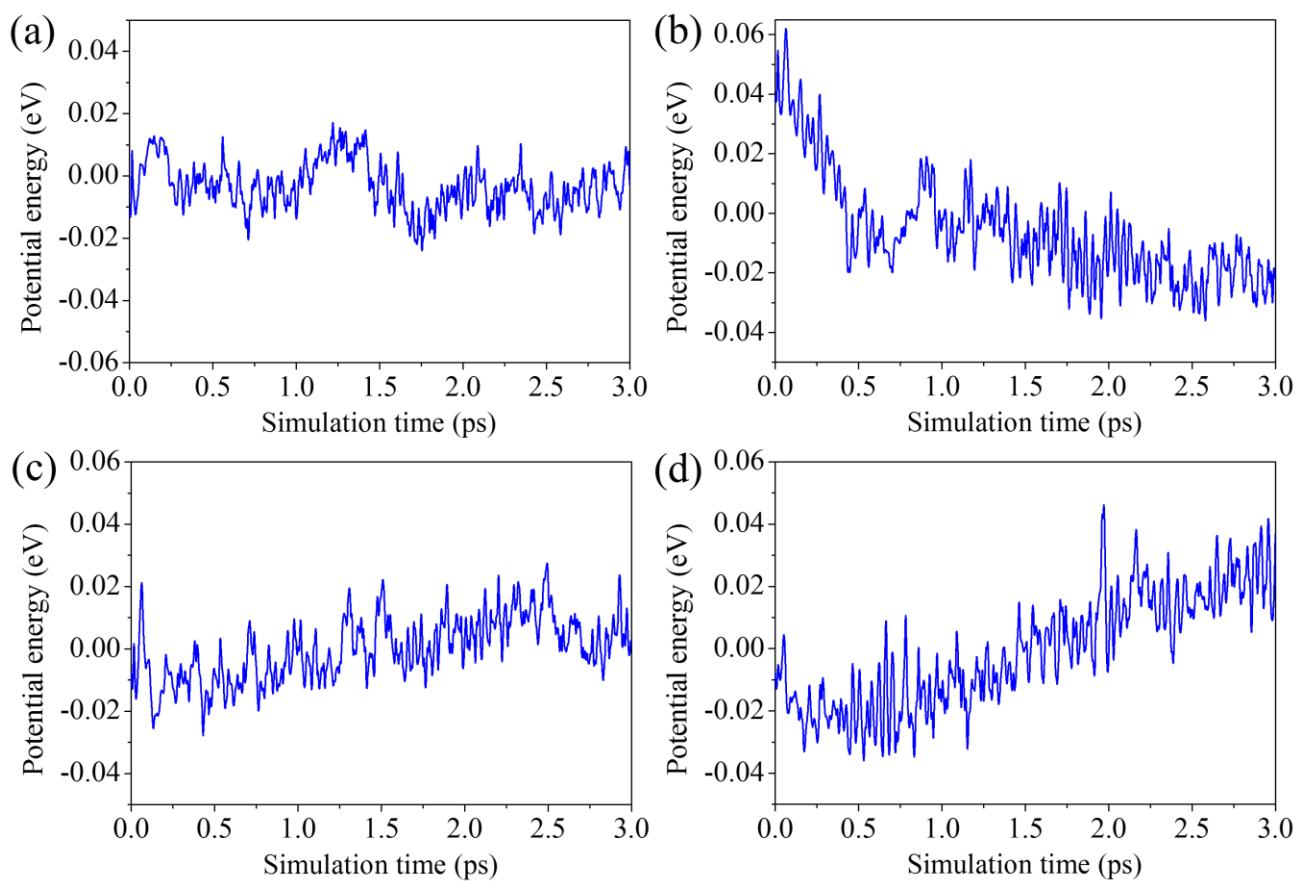

**Fig. S2.** Constant T simulation of Li<sub>n</sub>/BBP ( $n = 1 \sim 4$ ) under an electric field of  $0.25 \text{ V \AA}^{-1}$  using the Nosé-Hoover chain thermostat, with 1.5 fs time step, target temperature 300 K, nose Q ratio = 2.0. (a) ~ (d) show the potential energies of Li/BBP, Li<sub>2</sub>/BBP, Li<sub>3</sub>/BBP and Li<sub>4</sub>/BBP under an electric field of  $0.25 \text{ V \AA}^{-1}$  at each time step of the simulation within 3 ps, respectively.

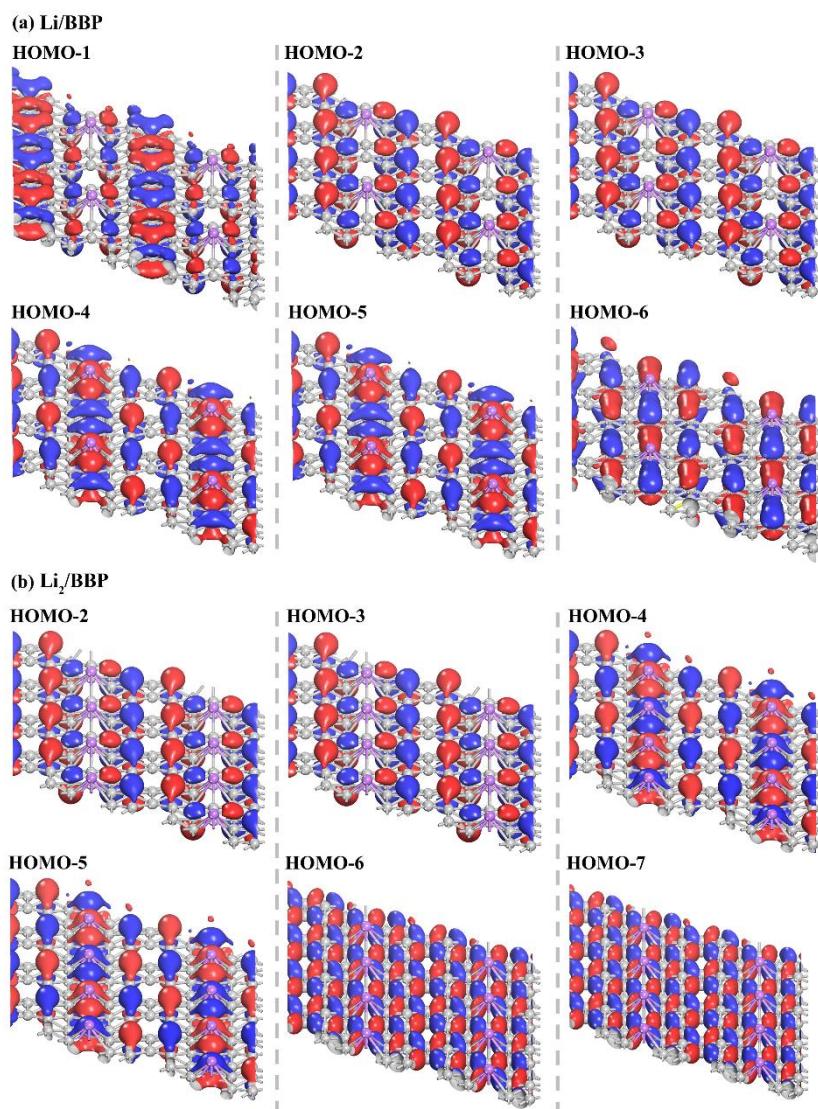

**Fig. S3.** Schematic images of HOMO-1 ~ HOMO-6 of Li/BBP (a) and HOMO-2 ~ HOMO-7 of Li<sub>2</sub>/BBP (b) under an electric field of  $0.25 \text{ V \AA}^{-1}$  and with an isovalue of  $0.03 \text{ e/\AA}^3$ .

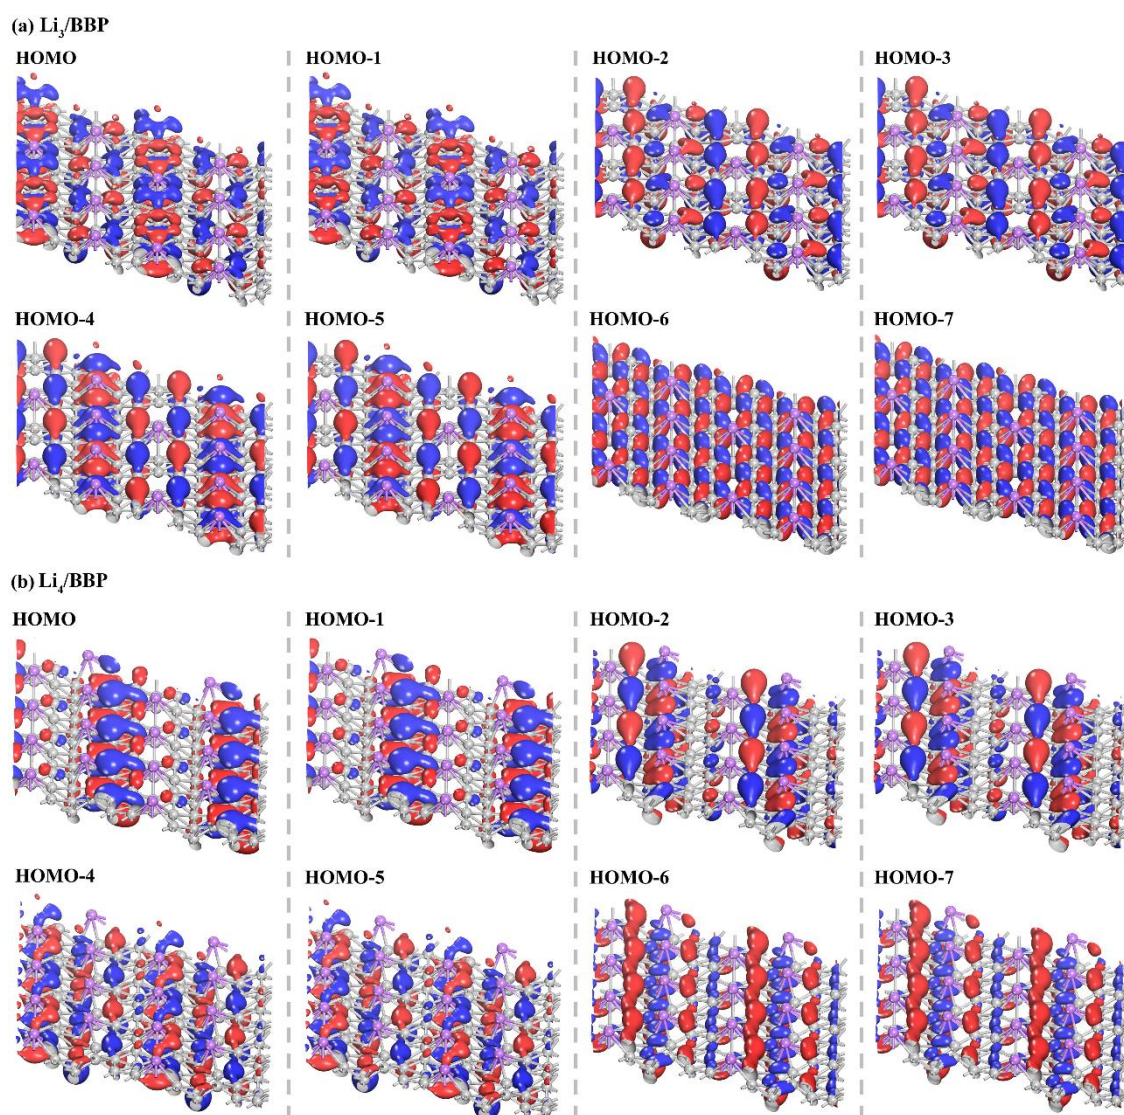

**Fig. S4.** Schematic images of HOMO ~ HOMO-7 of  $\text{Li}_3/\text{BBP}$  (a) and  $\text{Li}_4/\text{BBP}$  (b) under an electric field of  $0.25 \text{ V \AA}^{-1}$  and with isovalue of  $0.03 \text{ e/\AA}^3$ .

**Table S1** Optimized average Li-B bond lengths ( $\text{\AA}$ ) in  $\text{Li}_n/\text{BBP}$  ( $n = 1 \sim 4$ ) in the absence and presence of an applied electric field ( $E$ ,  $\text{V \AA}^{-1}$ ).

| E    | Li/BBP | Li <sub>2</sub> /BBP | Li <sub>3</sub> /BBP | Li <sub>4</sub> /BBP |
|------|--------|----------------------|----------------------|----------------------|
| 0.00 | 2.341  | 2.329                | 2.309                | 2.310                |
| 0.05 | 2.341  | 2.329                | 2.309                | 2.310                |
| 0.10 | 2.352  | 2.329                | 2.309                | 2.310                |
| 0.15 | 2.357  | 2.338                | 2.317                | 2.319                |
| 0.20 | 2.364  | 2.343                | 2.325                | 2.324                |
| 0.25 | 2.372  | 2.352                | 2.330                | 2.328                |

**Table S2** Dipole moments (D) of  $\text{Li}_n/\text{BBP}$ , the BBP substrate, and the decorated Li atoms and the induced dipole moment (D) of  $\text{Li}_n/\text{BBP}$  ( $n = 1 \sim 4$ ) in the presence of an applied electric field (E,  $\text{V \AA}^{-1}$ ).

| Structures               | E    | Dipole moment            |               |       | Induced dipole moment (D) |
|--------------------------|------|--------------------------|---------------|-------|---------------------------|
|                          |      | $\text{Li}_n/\text{BBP}$ | $\text{Li}_n$ | BBP   |                           |
| $\text{Li}/\text{BBP}$   | 0.00 | 3.93                     | 0.00          | -0.42 | 4.35                      |
|                          | 0.05 | 4.70                     | 0.00          | 0.32  | 4.38                      |
|                          | 0.10 | 5.61                     | 0.00          | 1.05  | 4.56                      |
|                          | 0.15 | 6.36                     | 0.00          | 1.78  | 4.57                      |
|                          | 0.20 | 7.16                     | 0.00          | 2.52  | 4.65                      |
|                          | 0.25 | 8.06                     | 0.00          | 3.25  | 4.81                      |
| $\text{Li}_2/\text{BBP}$ | 0.00 | 7.87                     | 0.00          | -0.42 | 8.29                      |
|                          | 0.05 | 8.62                     | 0.00          | 0.32  | 8.30                      |
|                          | 0.10 | 9.47                     | 0.00          | 1.05  | 8.42                      |
|                          | 0.15 | 10.34                    | 0.00          | 1.78  | 8.55                      |
|                          | 0.20 | 11.28                    | 0.00          | 2.52  | 8.76                      |
|                          | 0.25 | 12.14                    | 0.00          | 3.25  | 8.89                      |
| $\text{Li}_3/\text{BBP}$ | 0.00 | 11.11                    | 0.00          | -0.42 | 11.52                     |
|                          | 0.05 | 11.98                    | 0.00          | 0.32  | 11.66                     |
|                          | 0.10 | 12.85                    | 0.00          | 1.05  | 11.80                     |
|                          | 0.15 | 13.92                    | 0.00          | 1.78  | 12.14                     |
|                          | 0.20 | 14.94                    | 0.00          | 2.52  | 12.42                     |
|                          | 0.25 | 15.91                    | 0.00          | 3.25  | 12.66                     |
| $\text{Li}_4/\text{BBP}$ | 0.00 | 13.12                    | 0.00          | -0.42 | 13.54                     |
|                          | 0.05 | 14.11                    | 0.00          | 0.32  | 13.79                     |
|                          | 0.10 | 15.07                    | 0.00          | 1.05  | 14.02                     |
|                          | 0.15 | 16.39                    | 0.00          | 1.78  | 14.61                     |
|                          | 0.20 | 17.51                    | 0.00          | 2.52  | 15.00                     |
|                          | 0.25 | 18.63                    | 0.00          | 3.25  | 15.38                     |



**Table S3** Optimized average Li-B bond lengths (in Å) and average bond angles ( $\angle B_m Li_n B_o$ , in degree) in  $Li_n/BBP$  ( $n = 1 \sim 4$ ) before and after MD-NVT simulations (3 ps).  $B_m$  and  $B_o$  are two o-position boron atoms in a hexagonal hole in BBP, while the  $Li_n$  in  $\angle B_m Li_n B_o$  is the  $n^{\text{th}}$  Li atom decorated on the abovementioned hexagonal hole.

|               | E = 0                                                    |                      |                      |                      | E = 0.25 V Å <sup>-1</sup> |                      |                      |                      |
|---------------|----------------------------------------------------------|----------------------|----------------------|----------------------|----------------------------|----------------------|----------------------|----------------------|
|               | Li/BBP                                                   | Li <sub>2</sub> /BBP | Li <sub>3</sub> /BBP | Li <sub>4</sub> /BBP | Li/BBP                     | Li <sub>2</sub> /BBP | Li <sub>3</sub> /BBP | Li <sub>4</sub> /BBP |
|               | Average Li-B bond lengths (in Å)                         |                      |                      |                      |                            |                      |                      |                      |
| Before MD-NVT | 2.341                                                    | 2.329                | 2.309                | 2.310                | 2.372                      | 2.352                | 2.330                | 2.328                |
| After MD-NVT  | 2.313                                                    | 2.343                | 2.312                | 2.337                | 2.388                      | 2.414                | 2.364                | 2.314                |
| Variety       | -1.2%                                                    | 0.6%                 | 0.1%                 | 1.2%                 | 0.7%                       | 2.6%                 | 1.5%                 | -0.6%                |
|               | Average bond angles ( $\angle B_m Li_n B_o$ , in degree) |                      |                      |                      |                            |                      |                      |                      |
| Before MD-NVT | 42.110                                                   | 42.373               | 42.906               | 43.218               | 41.575                     | 41.971               | 42.444               | 42.772               |
| After MD-NVT  | 42.370                                                   | 42.655               | 43.434               | 43.608               | 41.720                     | 41.151               | 42.838               | 43.070               |
| Variety       | 0.6%                                                     | 0.7%                 | 1.2%                 | 0.9%                 | 0.3%                       | -2.0%                | 0.9%                 | 0.7%                 |

**Table S4.** Emission currents (A) from different orbitals of Li/BBP under different electric fields ( $\text{V \AA}^{-1}$ ).

| Orbitals | Electric fields |            |            |            |            |
|----------|-----------------|------------|------------|------------|------------|
|          | 0.05            | 0.10       | 0.15       | 0.20       | 0.25       |
| LUMO+10  | 1.7047E-74      | 1.9693E-73 | 0.0000E+00 | 0.0000E+00 | 0.0000E+00 |
| LUMO+9   | 4.3869E-72      | 4.0269E-72 | 0.0000E+00 | 0.0000E+00 | 0.0000E+00 |
| LUMO+8   | 1.7405E-63      | 9.0444E-63 | 2.1167E-63 | 0.0000E+00 | 0.0000E+00 |
| LUMO+7   | 3.1274E-46      | 3.4079E-46 | 4.4027E-47 | 1.4835E-47 | 0.0000E+00 |
| LUMO+6   | 9.4168E-35      | 6.1512E-36 | 5.0775E-36 | 4.6009E-36 | 4.5063E-36 |
| LUMO+5   | 2.0519E-29      | 1.9179E-30 | 1.8118E-30 | 1.9001E-30 | 1.9471E-30 |
| LUMO+4   | 1.7174E-22      | 3.6186E-23 | 2.8521E-23 | 2.3382E-23 | 1.8533E-23 |
| LUMO+3   | 7.7108E-22      | 4.9768E-22 | 4.6634E-22 | 3.6385E-22 | 3.0600E-22 |
| LUMO+2   | 2.0348E-15      | 5.6187E-16 | 9.0381E-16 | 9.5967E-16 | 1.5154E-15 |
| LUMO+1   | 1.7942E-14      | 2.5608E-14 | 1.7540E-14 | 1.6092E-14 | 1.6307E-14 |
| LUMO     | 5.4974E-12      | 1.2210E-11 | 1.1630E-11 | 1.2490E-11 | 1.1307E-11 |
| HOMO     | 1.3836E-08      | 1.4906E-08 | 1.8261E-08 | 1.7282E-08 | 2.0377E-08 |
| HOMO-1   | 1.1143E-06      | 1.9841E-06 | 2.0806E-06 | 2.0029E-06 | 3.2244E-06 |
| HOMO-2   | 1.4644E-06      | 1.6302E-06 | 1.6151E-06 | 1.7166E-06 | 1.6961E-06 |
| HOMO-3   | 6.2446E-06      | 5.9035E-06 | 5.8164E-06 | 5.6343E-06 | 5.5059E-06 |
| HOMO-4   | 2.2023E-07      | 2.4380E-07 | 2.4798E-07 | 2.3704E-07 | 1.9808E-07 |
| HOMO-5   | 8.2137E-07      | 8.8501E-07 | 8.7396E-07 | 8.3937E-07 | 8.4076E-07 |
| HOMO-6   | 5.5524E-06      | 5.2706E-06 | 5.1705E-06 | 5.0761E-06 | 4.9267E-06 |
| HOMO-7   | 7.6208E-09      | 6.4250E-09 | 6.4530E-09 | 7.3030E-09 | 5.8384E-09 |
| HOMO-8   | 7.6555E-08      | 8.8771E-08 | 1.1540E-07 | 9.1004E-08 | 9.2356E-08 |
| HOMO-9   | 1.0725E-07      | 9.4667E-08 | 9.7539E-08 | 9.5278E-08 | 9.4671E-08 |
| HOMO-10  | 5.4858E-11      | 5.5177E-11 | 5.5779E-11 | 5.6452E-11 | 5.7457E-11 |

**Table S5.** Emission currents (A) from different orbitals of Li<sub>2</sub>/BBP under different electric fields (V Å<sup>-1</sup>).

| Orbitals | Electric fields |            |            |            |            |
|----------|-----------------|------------|------------|------------|------------|
|          | 0.05            | 0.10       | 0.15       | 0.20       | 0.25       |
| LUMO+10  | 8.6044E-70      | 3.3126E-70 | 3.9907E-70 | 3.8608E-71 | 0.0000E+00 |
| LUMO+9   | 7.9569E-52      | 1.0436E-52 | 8.0839E-54 | 6.5753E-55 | 8.0672E-56 |
| LUMO+8   | 1.3723E-51      | 4.1800E-52 | 9.1174E-52 | 5.9865E-52 | 2.1114E-52 |
| LUMO+7   | 6.5286E-37      | 5.3021E-37 | 9.2696E-38 | 8.4627E-38 | 3.3563E-37 |
| LUMO+6   | 1.0108E-34      | 1.5221E-35 | 3.9298E-36 | 9.1876E-37 | 2.2760E-38 |
| LUMO+5   | 4.6231E-31      | 4.4409E-31 | 7.8340E-32 | 7.2812E-32 | 1.0263E-31 |
| LUMO+4   | 4.0088E-18      | 2.6707E-18 | 1.0228E-18 | 9.9248E-19 | 8.2024E-19 |
| LUMO+3   | 4.8305E-18      | 3.8417E-18 | 7.8940E-19 | 5.7616E-19 | 1.6490E-18 |
| LUMO+2   | 7.2323E-15      | 6.8868E-15 | 9.6482E-16 | 1.0544E-15 | 1.0557E-15 |
| LUMO+1   | 2.9272E-11      | 1.9132E-11 | 1.8318E-11 | 1.8804E-11 | 1.5721E-11 |
| LUMO     | 1.6303E-09      | 1.3397E-09 | 1.3135E-09 | 1.4951E-09 | 1.1349E-09 |
| HOMO     | 1.0357E-07      | 9.4505E-08 | 9.1894E-08 | 9.1799E-08 | 9.5127E-08 |
| HOMO-1   | 3.7072E-08      | 3.6245E-08 | 3.9449E-08 | 3.9216E-08 | 4.7657E-08 |
| HOMO-2   | 2.5394E-06      | 2.5738E-06 | 4.0730E-06 | 5.7653E-06 | 6.7595E-06 |
| HOMO-3   | 7.1469E-07      | 7.1336E-07 | 6.9348E-07 | 6.9625E-07 | 6.7917E-07 |
| HOMO-4   | 5.0351E-06      | 4.9940E-06 | 5.0944E-06 | 5.0592E-06 | 5.0336E-06 |
| HOMO-5   | 1.0515E-05      | 1.0449E-05 | 1.0048E-05 | 9.8528E-06 | 9.7285E-06 |
| HOMO-6   | 2.1538E-06      | 2.1571E-06 | 2.2899E-06 | 2.3187E-06 | 2.2892E-06 |
| HOMO-7   | 1.1585E-05      | 1.1447E-05 | 1.1043E-05 | 1.0952E-05 | 1.0755E-05 |
| HOMO-8   | 6.7468E-08      | 6.7268E-08 | 6.5827E-08 | 6.7202E-08 | 6.7353E-08 |
| HOMO-9   | 2.3376E-07      | 2.3306E-07 | 2.2759E-07 | 2.2996E-07 | 2.2454E-07 |
| HOMO-10  | 1.1243E-07      | 1.1111E-07 | 1.1762E-07 | 1.2329E-07 | 1.2426E-07 |

**Table S6.** Emission currents (A) from different orbitals of Li<sub>3</sub>/BBP under different electric fields (V Å<sup>-1</sup>).

| Orbitals | Electric fields |            |            |            |            |
|----------|-----------------|------------|------------|------------|------------|
|          | 0.05            | 0.10       | 0.15       | 0.20       | 0.25       |
| LUMO+10  | 1.6962E-57      | 1.1014E-57 | 8.7834E-58 | 6.7705E-58 | 4.2438E-58 |
| LUMO+9   | 1.7479E-49      | 1.2955E-50 | 4.0470E-51 | 1.0095E-51 | 1.6015E-52 |
| LUMO+8   | 3.8947E-47      | 3.5398E-48 | 1.2719E-48 | 3.1897E-49 | 5.6841E-50 |
| LUMO+7   | 2.6204E-43      | 1.9004E-43 | 9.3184E-44 | 8.9692E-44 | 8.8071E-44 |
| LUMO+6   | 1.7500E-34      | 1.6266E-34 | 2.7309E-34 | 3.5865E-34 | 1.3687E-34 |
| LUMO+5   | 9.3500E-31      | 9.9457E-31 | 1.8251E-30 | 2.9545E-30 | 2.1986E-32 |
| LUMO+4   | 5.9811E-25      | 1.3521E-25 | 8.3464E-26 | 4.6817E-26 | 1.7974E-26 |
| LUMO+3   | 5.7951E-18      | 5.1388E-18 | 2.8891E-17 | 3.8712E-17 | 4.5964E-17 |
| LUMO+2   | 6.3328E-15      | 5.3258E-15 | 8.6094E-15 | 8.7311E-15 | 8.7558E-15 |
| LUMO+1   | 1.3763E-11      | 1.2357E-11 | 1.9815E-11 | 1.9078E-11 | 1.9710E-11 |
| LUMO     | 7.6957E-08      | 7.5318E-08 | 7.1761E-08 | 9.8967E-08 | 1.0365E-07 |
| HOMO     | 2.5718E-07      | 2.4885E-07 | 2.6567E-07 | 3.4428E-07 | 3.4489E-07 |
| HOMO-1   | 8.8100E-07      | 8.6954E-07 | 9.9788E-07 | 1.0198E-06 | 1.0426E-06 |
| HOMO-2   | 4.7691E-06      | 4.7182E-06 | 5.3185E-06 | 5.9569E-06 | 6.2855E-06 |
| HOMO-3   | 9.1088E-07      | 9.0780E-07 | 8.9600E-07 | 9.9126E-07 | 9.5603E-07 |
| HOMO-4   | 1.2236E-05      | 1.2165E-05 | 1.2036E-05 | 1.2065E-05 | 1.1976E-05 |
| HOMO-5   | 7.4357E-06      | 7.4075E-06 | 9.6047E-06 | 9.7996E-06 | 1.0575E-05 |
| HOMO-6   | 3.7990E-06      | 3.8250E-06 | 3.9798E-06 | 3.9486E-06 | 3.9071E-06 |
| HOMO-7   | 9.7685E-06      | 9.7251E-06 | 9.9509E-06 | 9.4293E-06 | 9.3586E-06 |
| HOMO-8   | 2.0501E-07      | 2.0466E-07 | 1.9838E-07 | 1.9570E-07 | 1.5505E-07 |
| HOMO-9   | 8.7209E-08      | 8.6867E-08 | 1.0455E-07 | 1.0337E-07 | 1.0432E-07 |
| HOMO-10  | 1.5937E-07      | 1.5899E-07 | 1.6105E-07 | 1.6209E-07 | 1.6296E-07 |

**Table S7.** Emission currents (A) from different orbitals of Li<sub>4</sub>/BBP under different electric fields (V Å<sup>-1</sup>).

| Orbitals | Electric fields |            |            |            |            |
|----------|-----------------|------------|------------|------------|------------|
|          | 0.05            | 0.10       | 0.15       | 0.20       | 0.25       |
| LUMO+10  | 3.2411E-58      | 8.10E-61   | 5.3051E-59 | 1.8645E-59 | 6.9067E-60 |
| LUMO+9   | 7.5600E-53      | 5.80E-59   | 5.7639E-53 | 7.1591E-53 | 9.2426E-53 |
| LUMO+8   | 4.0978E-48      | 3.26E-53   | 6.9143E-49 | 3.3611E-49 | 1.7425E-49 |
| LUMO+7   | 4.7147E-48      | 1.75E-48   | 1.4473E-47 | 6.1208E-48 | 9.8947E-48 |
| LUMO+6   | 1.0297E-45      | 4.91E-48   | 2.3348E-45 | 7.8703E-46 | 1.3397E-45 |
| LUMO+5   | 9.1083E-34      | 6.45E-46   | 2.8165E-34 | 1.6185E-34 | 8.4708E-35 |
| LUMO+4   | 7.3066E-26      | 2.39E-34   | 3.7782E-26 | 7.9322E-26 | 1.1112E-25 |
| LUMO+3   | 7.7926E-18      | 6.26E-26   | 8.8154E-18 | 1.0267E-17 | 1.0949E-17 |
| LUMO+2   | 8.7461E-08      | 6.91E-18   | 1.2760E-07 | 1.0175E-07 | 7.6964E-08 |
| LUMO+1   | 4.3027E-07      | 8.85E-08   | 5.1842E-07 | 6.3943E-07 | 6.9156E-07 |
| LUMO     | 1.7255E-07      | 4.18E-07   | 5.0503E-07 | 6.4591E-07 | 7.3261E-07 |
| HOMO     | 3.2453E-06      | 1.69E-07   | 3.2791E-06 | 4.0966E-06 | 5.0615E-06 |
| HOMO-1   | 3.3044E-06      | 3.23E-06   | 3.3041E-06 | 4.8558E-06 | 5.6235E-06 |
| HOMO-2   | 6.6836E-06      | 3.2763E-06 | 6.9478E-06 | 6.9627E-06 | 7.1742E-06 |
| HOMO-3   | 2.8056E-06      | 6.5805E-06 | 2.7951E-06 | 2.8738E-06 | 3.0601E-06 |
| HOMO-4   | 6.7594E-06      | 2.7952E-06 | 8.2835E-06 | 7.9310E-06 | 7.8261E-06 |
| HOMO-5   | 1.8351E-06      | 6.7279E-06 | 2.2139E-06 | 2.2732E-06 | 2.1752E-06 |
| HOMO-6   | 7.3278E-06      | 1.8351E-06 | 7.1473E-06 | 7.0893E-06 | 7.0500E-06 |
| HOMO-7   | 1.0555E-05      | 7.3055E-06 | 1.0380E-05 | 1.0088E-05 | 9.9106E-06 |
| HOMO-8   | 6.5002E-07      | 1.0506E-05 | 5.8670E-07 | 5.2480E-07 | 5.1875E-07 |
| HOMO-9   | 4.6079E-07      | 6.5134E-07 | 4.3114E-07 | 4.3059E-07 | 4.2618E-07 |
| HOMO-10  | 4.5890E-07      | 4.6120E-07 | 3.5803E-07 | 4.0549E-07 | 4.0716E-07 |

**Structure data S1.** Optimized geometries of Li<sub>n</sub>/BBP in the absence of an applied electric field.

Li/BBP without an applied electric field

|    |         |         |          |
|----|---------|---------|----------|
| B  | 0.49454 | 0.97488 | 0.00736  |
| B  | 0.99428 | 0.47478 | -0.01058 |
| B  | 0.32899 | 0.64063 | -0.00030 |
| B  | 0.32926 | 0.14063 | -0.00226 |
| B  | 0.66033 | 0.14063 | -0.00226 |
| B  | 0.49505 | 0.30638 | 0.00736  |
| B  | 0.32836 | 0.80675 | -0.00977 |
| B  | 0.82878 | 0.30638 | 0.00736  |
| B  | 0.16114 | 0.47478 | -0.01058 |
| B  | 0.66122 | 0.47450 | -0.00977 |
| B  | 0.16002 | 0.64063 | 0.00052  |
| B  | 0.99530 | 0.80647 | -0.01058 |
| B  | 0.32844 | 0.30690 | 0.00639  |
| B  | 0.16080 | 0.97488 | 0.00736  |
| B  | 0.49449 | 0.47450 | -0.00977 |
| B  | 0.82957 | 0.64063 | 0.00052  |
| B  | 0.82844 | 0.80647 | -0.01058 |
| B  | 0.66115 | 0.97435 | 0.00639  |
| B  | 0.99471 | 0.97435 | 0.00639  |
| B  | 0.82926 | 0.14063 | -0.00226 |
| B  | 0.66059 | 0.64063 | -0.00030 |
| B  | 0.16032 | 0.14063 | -0.00226 |
| B  | 0.49510 | 0.80675 | -0.00977 |
| B  | 0.99487 | 0.30690 | 0.00639  |
| B  | 0.32843 | 0.97336 | 0.01531  |
| B  | 0.32819 | 0.47209 | -0.01951 |
| B  | 0.82859 | 0.97304 | 0.01420  |
| B  | 0.66116 | 0.30790 | 0.01531  |
| B  | 0.82993 | 0.47209 | -0.01951 |
| B  | 0.66140 | 0.80916 | -0.01951 |
| B  | 0.16100 | 0.30822 | 0.01420  |
| B  | 0.15965 | 0.80916 | -0.01951 |
| Li | 0.49479 | 0.64063 | 0.09528  |

Li<sub>2</sub>/BBP without an applied electric field

|    |         |         |          |
|----|---------|---------|----------|
| B  | 0.49472 | 0.97484 | 0.00720  |
| B  | 0.99405 | 0.47503 | -0.01065 |
| B  | 0.32898 | 0.64063 | 0.00301  |
| B  | 0.32940 | 0.14063 | -0.00272 |
| B  | 0.66018 | 0.14063 | -0.00272 |
| B  | 0.49486 | 0.30641 | 0.00720  |
| B  | 0.32845 | 0.80622 | -0.01065 |
| B  | 0.82894 | 0.30641 | 0.00720  |
| B  | 0.16113 | 0.47503 | -0.01065 |
| B  | 0.66113 | 0.47503 | -0.01065 |
| B  | 0.16060 | 0.64063 | 0.00301  |
| B  | 0.99554 | 0.80622 | -0.01065 |
| B  | 0.32894 | 0.30641 | 0.00720  |
| B  | 0.16065 | 0.97484 | 0.00720  |
| B  | 0.49405 | 0.47503 | -0.01065 |
| B  | 0.82898 | 0.64063 | 0.00301  |
| B  | 0.82845 | 0.80622 | -0.01065 |
| B  | 0.66065 | 0.97484 | 0.00720  |
| B  | 0.99472 | 0.97484 | 0.00720  |
| B  | 0.82940 | 0.14063 | -0.00272 |
| B  | 0.66060 | 0.64063 | 0.00301  |
| B  | 0.16018 | 0.14063 | -0.00272 |
| B  | 0.49554 | 0.80622 | -0.01065 |
| B  | 0.99486 | 0.30641 | 0.00720  |
| B  | 0.32824 | 0.97373 | 0.01496  |
| B  | 0.32941 | 0.47139 | -0.02178 |
| B  | 0.82824 | 0.97373 | 0.01496  |
| B  | 0.66134 | 0.30753 | 0.01496  |
| B  | 0.82941 | 0.47139 | -0.02178 |
| B  | 0.66017 | 0.80986 | -0.02178 |
| B  | 0.16134 | 0.30753 | 0.01496  |
| B  | 0.16017 | 0.80986 | -0.02178 |
| Li | 0.99479 | 0.64063 | 0.09477  |
| Li | 0.49479 | 0.64063 | 0.09477  |

Li<sub>3</sub>/BBP without an applied electric field

|    |         |         |          |
|----|---------|---------|----------|
| B  | 0.49466 | 0.97402 | 0.01189  |
| B  | 0.99356 | 0.47477 | -0.01388 |
| B  | 0.32906 | 0.64050 | -0.00099 |
| B  | 0.32997 | 0.14063 | 0.00153  |
| B  | 0.65961 | 0.14063 | 0.00153  |
| B  | 0.49493 | 0.30723 | 0.01189  |
| B  | 0.32770 | 0.80649 | -0.01388 |
| B  | 0.82777 | 0.30803 | 0.01309  |
| B  | 0.16207 | 0.47347 | -0.01497 |
| B  | 0.66189 | 0.47477 | -0.01388 |
| B  | 0.16065 | 0.64050 | -0.00099 |
| B  | 0.99602 | 0.80649 | -0.01388 |
| B  | 0.32805 | 0.30723 | 0.01189  |
| B  | 0.16182 | 0.97323 | 0.01309  |
| B  | 0.49467 | 0.47347 | -0.01497 |
| B  | 0.82894 | 0.64075 | -0.00099 |
| B  | 0.82751 | 0.80778 | -0.01497 |
| B  | 0.66153 | 0.97402 | 0.01189  |
| B  | 0.99516 | 0.97323 | 0.01309  |
| B  | 0.82991 | 0.14063 | 0.00018  |
| B  | 0.66052 | 0.64075 | -0.00099 |
| B  | 0.15968 | 0.14063 | 0.00018  |
| B  | 0.49492 | 0.80778 | -0.01497 |
| B  | 0.99442 | 0.30803 | 0.01309  |
| B  | 0.32947 | 0.97248 | 0.01971  |
| B  | 0.32968 | 0.47086 | -0.02443 |
| B  | 0.82826 | 0.97248 | 0.01971  |
| B  | 0.66012 | 0.30877 | 0.01971  |
| B  | 0.82966 | 0.47089 | -0.02852 |
| B  | 0.65991 | 0.81040 | -0.02443 |
| B  | 0.16132 | 0.30877 | 0.01971  |
| B  | 0.15992 | 0.81036 | -0.02852 |
| Li | 0.99479 | 0.64063 | 0.08809  |
| Li | 0.49479 | 0.64063 | 0.08809  |
| Li | 0.99479 | 0.14063 | 0.10870  |



Li<sub>4</sub>/BBP without an applied electric field

|    |         |         |          |
|----|---------|---------|----------|
| B  | 0.49458 | 0.97079 | 0.02317  |
| B  | 0.99433 | 0.47045 | -0.03490 |
| B  | 0.32911 | 0.63602 | -0.00855 |
| B  | 0.32858 | 0.13853 | 0.00108  |
| B  | 0.65848 | 0.13855 | 0.00111  |
| B  | 0.49388 | 0.30824 | 0.00596  |
| B  | 0.33050 | 0.79904 | 0.01514  |
| B  | 0.82350 | 0.30820 | 0.00591  |
| B  | 0.16083 | 0.47043 | -0.03488 |
| B  | 0.66083 | 0.47043 | -0.03488 |
| B  | 0.16047 | 0.63600 | -0.00851 |
| B  | 0.99604 | 0.79904 | 0.01519  |
| B  | 0.32350 | 0.30820 | 0.00591  |
| B  | 0.16024 | 0.97078 | 0.02314  |
| B  | 0.49433 | 0.47045 | -0.03490 |
| B  | 0.82911 | 0.63602 | -0.00855 |
| B  | 0.83050 | 0.79904 | 0.01514  |
| B  | 0.66024 | 0.97078 | 0.02314  |
| B  | 0.99458 | 0.97079 | 0.02317  |
| B  | 0.82858 | 0.13853 | 0.00108  |
| B  | 0.66047 | 0.63600 | -0.00851 |
| B  | 0.15848 | 0.13855 | 0.00111  |
| B  | 0.49604 | 0.79904 | 0.01519  |
| B  | 0.99388 | 0.30824 | 0.00596  |
| B  | 0.32628 | 0.97306 | 0.00121  |
| B  | 0.32901 | 0.46759 | -0.04085 |
| B  | 0.82628 | 0.97306 | 0.00121  |
| B  | 0.65521 | 0.31516 | 0.02484  |
| B  | 0.82901 | 0.46759 | -0.04085 |
| B  | 0.66081 | 0.80396 | -0.00725 |
| B  | 0.15521 | 0.31516 | 0.02484  |
| B  | 0.16081 | 0.80396 | -0.00725 |
| Li | 1.01970 | 0.58615 | 0.08438  |
| Li | 0.51970 | 0.58615 | 0.08438  |
| Li | 0.98472 | 0.15613 | 0.10771  |
| Li | 0.48472 | 0.15613 | 0.10771  |

**Structure data S2.** Optimized geometries of Li<sub>n</sub>/BBP in the presence of an applied electric field (E, V Å<sup>-1</sup>).

Li/BBP under an applied electric field of 0.05 V Å<sup>-1</sup>

|    |         |         |          |
|----|---------|---------|----------|
| B  | 0.49453 | 0.97488 | 0.00736  |
| B  | 0.99428 | 0.47479 | -0.01060 |
| B  | 0.32899 | 0.64063 | -0.00023 |
| B  | 0.32926 | 0.14063 | -0.00230 |
| B  | 0.66033 | 0.14062 | -0.00230 |
| B  | 0.49505 | 0.30638 | 0.00736  |
| B  | 0.32836 | 0.80674 | -0.00976 |
| B  | 0.82878 | 0.30638 | 0.00736  |
| B  | 0.16115 | 0.47479 | -0.01060 |
| B  | 0.66122 | 0.47451 | -0.00976 |
| B  | 0.16002 | 0.64062 | 0.00058  |
| B  | 0.99530 | 0.80647 | -0.01060 |
| B  | 0.32843 | 0.30690 | 0.00638  |
| B  | 0.16081 | 0.97488 | 0.00736  |
| B  | 0.49448 | 0.47451 | -0.00976 |
| B  | 0.82956 | 0.64063 | 0.00058  |
| B  | 0.82844 | 0.80647 | -0.01060 |
| B  | 0.66115 | 0.97435 | 0.00638  |
| B  | 0.99471 | 0.97435 | 0.00638  |
| B  | 0.82926 | 0.14063 | -0.00229 |
| B  | 0.66059 | 0.64063 | -0.00023 |
| B  | 0.16033 | 0.14063 | -0.00229 |
| B  | 0.49510 | 0.80675 | -0.00976 |
| B  | 0.99487 | 0.30690 | 0.00638  |
| B  | 0.32842 | 0.97336 | 0.01532  |
| B  | 0.32818 | 0.47210 | -0.01953 |
| B  | 0.82858 | 0.97305 | 0.01419  |
| B  | 0.66116 | 0.30789 | 0.01532  |
| B  | 0.82993 | 0.47210 | -0.01953 |
| B  | 0.66140 | 0.80916 | -0.01953 |
| B  | 0.16100 | 0.30821 | 0.01419  |
| B  | 0.15966 | 0.80916 | -0.01953 |
| Li | 0.49479 | 0.64063 | 0.09532  |

Li/BBP under an applied electric field of  $0.10 \text{ V \AA}^{-1}$

|    |         |         |          |
|----|---------|---------|----------|
| B  | 0.49450 | 0.97485 | 0.00714  |
| B  | 0.99414 | 0.47492 | -0.01089 |
| B  | 0.32893 | 0.64065 | 0.00153  |
| B  | 0.32930 | 0.14066 | -0.00299 |
| B  | 0.66029 | 0.14060 | -0.00299 |
| B  | 0.49508 | 0.30640 | 0.00714  |
| B  | 0.32829 | 0.80667 | -0.00970 |
| B  | 0.82873 | 0.30637 | 0.00724  |
| B  | 0.16113 | 0.47496 | -0.01092 |
| B  | 0.66130 | 0.47458 | -0.00970 |
| B  | 0.16007 | 0.64061 | 0.00185  |
| B  | 0.99544 | 0.80634 | -0.01089 |
| B  | 0.32836 | 0.30694 | 0.00615  |
| B  | 0.16085 | 0.97488 | 0.00724  |
| B  | 0.49436 | 0.47455 | -0.00967 |
| B  | 0.82952 | 0.64064 | 0.00185  |
| B  | 0.82845 | 0.80629 | -0.01092 |
| B  | 0.66122 | 0.97431 | 0.00615  |
| B  | 0.99469 | 0.97429 | 0.00611  |
| B  | 0.82931 | 0.14063 | -0.00296 |
| B  | 0.66066 | 0.64060 | 0.00153  |
| B  | 0.16028 | 0.14062 | -0.00296 |
| B  | 0.49523 | 0.80670 | -0.00967 |
| B  | 0.99490 | 0.30697 | 0.00611  |
| B  | 0.32836 | 0.97339 | 0.01543  |
| B  | 0.32805 | 0.47225 | -0.02013 |
| B  | 0.82846 | 0.97316 | 0.01406  |
| B  | 0.66122 | 0.30786 | 0.01543  |
| B  | 0.82984 | 0.47222 | -0.02010 |
| B  | 0.66153 | 0.80900 | -0.02013 |
| B  | 0.16112 | 0.30810 | 0.01406  |
| B  | 0.15975 | 0.80904 | -0.02010 |
| Li | 0.49479 | 0.64063 | 0.09689  |

Li/BBP under an applied electric field of  $0.15 \text{ V \AA}^{-1}$

|    |         |         |          |
|----|---------|---------|----------|
| B  | 0.49448 | 0.97487 | 0.00708  |
| B  | 0.99415 | 0.47490 | -0.01109 |
| B  | 0.32892 | 0.64066 | 0.00181  |
| B  | 0.32931 | 0.14065 | -0.00316 |
| B  | 0.66027 | 0.14061 | -0.00316 |
| B  | 0.49511 | 0.30638 | 0.00708  |
| B  | 0.32835 | 0.80659 | -0.00946 |
| B  | 0.82871 | 0.30636 | 0.00719  |
| B  | 0.16115 | 0.47494 | -0.01114 |
| B  | 0.66123 | 0.47466 | -0.00946 |
| B  | 0.16004 | 0.64060 | 0.00183  |
| B  | 0.99543 | 0.80635 | -0.01109 |
| B  | 0.32837 | 0.30691 | 0.00600  |
| B  | 0.16087 | 0.97489 | 0.00719  |
| B  | 0.49435 | 0.47463 | -0.00942 |
| B  | 0.82955 | 0.64066 | 0.00183  |
| B  | 0.82843 | 0.80632 | -0.01114 |
| B  | 0.66121 | 0.97435 | 0.00600  |
| B  | 0.99467 | 0.97432 | 0.00595  |
| B  | 0.82929 | 0.14066 | -0.00312 |
| B  | 0.66066 | 0.64060 | 0.00181  |
| B  | 0.16029 | 0.14059 | -0.00312 |
| B  | 0.49524 | 0.80663 | -0.00942 |
| B  | 0.99492 | 0.30693 | 0.00595  |
| B  | 0.32834 | 0.97343 | 0.01553  |
| B  | 0.32807 | 0.47229 | -0.02008 |
| B  | 0.82844 | 0.97317 | 0.01394  |
| B  | 0.66124 | 0.30783 | 0.01553  |
| B  | 0.82976 | 0.47227 | -0.02004 |
| B  | 0.66152 | 0.80896 | -0.02008 |
| B  | 0.16114 | 0.30808 | 0.01394  |
| B  | 0.15982 | 0.80899 | -0.02004 |
| Li | 0.49479 | 0.64063 | 0.09760  |

Li/BBP under an applied electric field of 0.20 V Å<sup>-1</sup>

|    |         |         |          |
|----|---------|---------|----------|
| B  | 0.49449 | 0.97487 | 0.00709  |
| B  | 0.99414 | 0.47494 | -0.01098 |
| B  | 0.32891 | 0.64064 | 0.00166  |
| B  | 0.32929 | 0.14065 | -0.00303 |
| B  | 0.66029 | 0.14060 | -0.00303 |
| B  | 0.49509 | 0.30639 | 0.00709  |
| B  | 0.32827 | 0.80671 | -0.00969 |
| B  | 0.82875 | 0.30636 | 0.00715  |
| B  | 0.16111 | 0.47497 | -0.01099 |
| B  | 0.66131 | 0.47455 | -0.00969 |
| B  | 0.16009 | 0.64061 | 0.00173  |
| B  | 0.99545 | 0.80632 | -0.01098 |
| B  | 0.32835 | 0.30696 | 0.00609  |
| B  | 0.16084 | 0.97489 | 0.00715  |
| B  | 0.49437 | 0.47452 | -0.00967 |
| B  | 0.82949 | 0.64064 | 0.00173  |
| B  | 0.82847 | 0.80628 | -0.01099 |
| B  | 0.66124 | 0.97430 | 0.00609  |
| B  | 0.99468 | 0.97428 | 0.00606  |
| B  | 0.82931 | 0.14062 | -0.00301 |
| B  | 0.66067 | 0.64062 | 0.00166  |
| B  | 0.16027 | 0.14064 | -0.00301 |
| B  | 0.49522 | 0.80673 | -0.00967 |
| B  | 0.99490 | 0.30698 | 0.00606  |
| B  | 0.32838 | 0.97338 | 0.01552  |
| B  | 0.32811 | 0.47222 | -0.02015 |
| B  | 0.82850 | 0.97312 | 0.01397  |
| B  | 0.66120 | 0.30788 | 0.01552  |
| B  | 0.82983 | 0.47220 | -0.02011 |
| B  | 0.66147 | 0.80903 | -0.02015 |
| B  | 0.16108 | 0.30814 | 0.01397  |
| B  | 0.15975 | 0.80905 | -0.02011 |
| Li | 0.49479 | 0.64063 | 0.09798  |

Li/BBP under an applied electric field of  $0.25 \text{ V \AA}^{-1}$

|    |         |         |          |
|----|---------|---------|----------|
| B  | 0.49446 | 0.97491 | 0.00702  |
| B  | 0.99411 | 0.47495 | -0.01098 |
| B  | 0.32898 | 0.64063 | 0.00166  |
| B  | 0.32926 | 0.14069 | -0.00306 |
| B  | 0.66032 | 0.14057 | -0.00306 |
| B  | 0.49512 | 0.30634 | 0.00702  |
| B  | 0.32828 | 0.80673 | -0.00976 |
| B  | 0.82874 | 0.30634 | 0.00706  |
| B  | 0.16114 | 0.47497 | -0.01099 |
| B  | 0.66130 | 0.47453 | -0.00976 |
| B  | 0.16018 | 0.64061 | 0.00174  |
| B  | 0.99547 | 0.80630 | -0.01098 |
| B  | 0.32834 | 0.30697 | 0.00611  |
| B  | 0.16084 | 0.97492 | 0.00706  |
| B  | 0.49439 | 0.47451 | -0.00973 |
| B  | 0.82941 | 0.64065 | 0.00174  |
| B  | 0.82845 | 0.80629 | -0.01099 |
| B  | 0.66124 | 0.97428 | 0.00611  |
| B  | 0.99469 | 0.97427 | 0.00608  |
| B  | 0.82931 | 0.14059 | -0.00304 |
| B  | 0.66060 | 0.64063 | 0.00166  |
| B  | 0.16028 | 0.14066 | -0.00304 |
| B  | 0.49519 | 0.80675 | -0.00973 |
| B  | 0.99489 | 0.30699 | 0.00608  |
| B  | 0.32840 | 0.97337 | 0.01550  |
| B  | 0.32818 | 0.47221 | -0.02015 |
| B  | 0.82853 | 0.97309 | 0.01392  |
| B  | 0.66119 | 0.30788 | 0.01550  |
| B  | 0.82979 | 0.47220 | -0.02011 |
| B  | 0.66141 | 0.80904 | -0.02015 |
| B  | 0.16106 | 0.30816 | 0.01392  |
| B  | 0.15979 | 0.80905 | -0.02011 |
| Li | 0.49479 | 0.64063 | 0.09866  |

Li<sub>2</sub>/BBP under an applied electric field of 0.05 V Å<sup>-1</sup>

|    |         |         |          |
|----|---------|---------|----------|
| B  | 0.49472 | 0.97484 | 0.00720  |
| B  | 0.99404 | 0.47503 | -0.01066 |
| B  | 0.32898 | 0.64063 | 0.00305  |
| B  | 0.32940 | 0.14063 | -0.00273 |
| B  | 0.66018 | 0.14062 | -0.00273 |
| B  | 0.49487 | 0.30641 | 0.00720  |
| B  | 0.32845 | 0.80622 | -0.01066 |
| B  | 0.82893 | 0.30641 | 0.00720  |
| B  | 0.16113 | 0.47504 | -0.01066 |
| B  | 0.66113 | 0.47504 | -0.01066 |
| B  | 0.16060 | 0.64062 | 0.00305  |
| B  | 0.99554 | 0.80622 | -0.01066 |
| B  | 0.32893 | 0.30641 | 0.00720  |
| B  | 0.16065 | 0.97484 | 0.00720  |
| B  | 0.49404 | 0.47503 | -0.01066 |
| B  | 0.82898 | 0.64063 | 0.00305  |
| B  | 0.82845 | 0.80622 | -0.01066 |
| B  | 0.66065 | 0.97484 | 0.00720  |
| B  | 0.99472 | 0.97484 | 0.00720  |
| B  | 0.82940 | 0.14063 | -0.00273 |
| B  | 0.66060 | 0.64062 | 0.00305  |
| B  | 0.16018 | 0.14062 | -0.00273 |
| B  | 0.49554 | 0.80622 | -0.01066 |
| B  | 0.99487 | 0.30641 | 0.00720  |
| B  | 0.32824 | 0.97373 | 0.01496  |
| B  | 0.32940 | 0.47140 | -0.02180 |
| B  | 0.82824 | 0.97373 | 0.01496  |
| B  | 0.66134 | 0.30753 | 0.01496  |
| B  | 0.82940 | 0.47140 | -0.02180 |
| B  | 0.66018 | 0.80986 | -0.02180 |
| B  | 0.16134 | 0.30753 | 0.01496  |
| B  | 0.16018 | 0.80986 | -0.02180 |
| Li | 0.99479 | 0.64063 | 0.09478  |
| Li | 0.49479 | 0.64063 | 0.09478  |

Li<sub>2</sub>/BBP under an applied electric field of 0.10 V Å<sup>-1</sup>

|    |         |         |          |
|----|---------|---------|----------|
| B  | 0.49472 | 0.97484 | 0.00719  |
| B  | 0.99404 | 0.47504 | -0.01065 |
| B  | 0.32898 | 0.64063 | 0.00305  |
| B  | 0.32940 | 0.14063 | -0.00275 |
| B  | 0.66018 | 0.14062 | -0.00275 |
| B  | 0.49487 | 0.30641 | 0.00719  |
| B  | 0.32845 | 0.80621 | -0.01065 |
| B  | 0.82893 | 0.30641 | 0.00720  |
| B  | 0.16113 | 0.47504 | -0.01065 |
| B  | 0.66113 | 0.47504 | -0.01065 |
| B  | 0.16060 | 0.64062 | 0.00305  |
| B  | 0.99554 | 0.80621 | -0.01065 |
| B  | 0.32893 | 0.30641 | 0.00720  |
| B  | 0.16065 | 0.97484 | 0.00720  |
| B  | 0.49404 | 0.47504 | -0.01065 |
| B  | 0.82898 | 0.64063 | 0.00305  |
| B  | 0.82845 | 0.80621 | -0.01065 |
| B  | 0.66065 | 0.97484 | 0.00720  |
| B  | 0.99472 | 0.97484 | 0.00719  |
| B  | 0.82940 | 0.14063 | -0.00275 |
| B  | 0.66060 | 0.64062 | 0.00305  |
| B  | 0.16018 | 0.14062 | -0.00275 |
| B  | 0.49554 | 0.80621 | -0.01065 |
| B  | 0.99487 | 0.30641 | 0.00719  |
| B  | 0.32824 | 0.97373 | 0.01495  |
| B  | 0.32940 | 0.47140 | -0.02179 |
| B  | 0.82824 | 0.97373 | 0.01495  |
| B  | 0.66135 | 0.30752 | 0.01495  |
| B  | 0.82940 | 0.47140 | -0.02179 |
| B  | 0.66018 | 0.80985 | -0.02179 |
| B  | 0.16135 | 0.30752 | 0.01495  |
| B  | 0.16018 | 0.80985 | -0.02179 |
| Li | 0.99479 | 0.64063 | 0.09480  |
| Li | 0.49479 | 0.64063 | 0.09480  |



Li<sub>2</sub>/BBP under an applied electric field of 0.15 V Å<sup>-1</sup>

|    |         |         |          |
|----|---------|---------|----------|
| B  | 0.49467 | 0.97480 | 0.00719  |
| B  | 0.99395 | 0.47505 | -0.01091 |
| B  | 0.32894 | 0.64064 | 0.00383  |
| B  | 0.32947 | 0.14064 | -0.00309 |
| B  | 0.66011 | 0.14062 | -0.00309 |
| B  | 0.49492 | 0.30646 | 0.00719  |
| B  | 0.32838 | 0.80617 | -0.01092 |
| B  | 0.82886 | 0.30643 | 0.00722  |
| B  | 0.16120 | 0.47509 | -0.01092 |
| B  | 0.66120 | 0.47509 | -0.01092 |
| B  | 0.16064 | 0.64062 | 0.00383  |
| B  | 0.99563 | 0.80621 | -0.01091 |
| B  | 0.32886 | 0.30643 | 0.00722  |
| B  | 0.16072 | 0.97483 | 0.00722  |
| B  | 0.49395 | 0.47505 | -0.01091 |
| B  | 0.82894 | 0.64064 | 0.00383  |
| B  | 0.82838 | 0.80617 | -0.01092 |
| B  | 0.66072 | 0.97483 | 0.00722  |
| B  | 0.99467 | 0.97480 | 0.00719  |
| B  | 0.82947 | 0.14064 | -0.00309 |
| B  | 0.66064 | 0.64062 | 0.00383  |
| B  | 0.16011 | 0.14062 | -0.00309 |
| B  | 0.49563 | 0.80621 | -0.01091 |
| B  | 0.99492 | 0.30646 | 0.00719  |
| B  | 0.32818 | 0.97379 | 0.01492  |
| B  | 0.32931 | 0.47156 | -0.02213 |
| B  | 0.82818 | 0.97379 | 0.01492  |
| B  | 0.66140 | 0.30746 | 0.01492  |
| B  | 0.82931 | 0.47156 | -0.02213 |
| B  | 0.66027 | 0.80970 | -0.02213 |
| B  | 0.16140 | 0.30746 | 0.01492  |
| B  | 0.16027 | 0.80970 | -0.02213 |
| Li | 0.99479 | 0.64063 | 0.09565  |
| Li | 0.49479 | 0.64063 | 0.09565  |

Li<sub>2</sub>/BBP under an applied electric field of 0.20V Å<sup>-1</sup>

|    |         |         |          |
|----|---------|---------|----------|
| B  | 0.49464 | 0.97483 | 0.00701  |
| B  | 0.99393 | 0.47512 | -0.01082 |
| B  | 0.32894 | 0.64064 | 0.00407  |
| B  | 0.32948 | 0.14064 | -0.00339 |
| B  | 0.66010 | 0.14061 | -0.00339 |
| B  | 0.49494 | 0.30643 | 0.00701  |
| B  | 0.32843 | 0.80609 | -0.01083 |
| B  | 0.82887 | 0.30639 | 0.00704  |
| B  | 0.16115 | 0.47516 | -0.01083 |
| B  | 0.66115 | 0.47516 | -0.01083 |
| B  | 0.16064 | 0.64061 | 0.00407  |
| B  | 0.99565 | 0.80614 | -0.01082 |
| B  | 0.32887 | 0.30639 | 0.00704  |
| B  | 0.16072 | 0.97486 | 0.00704  |
| B  | 0.49393 | 0.47512 | -0.01082 |
| B  | 0.82894 | 0.64064 | 0.00407  |
| B  | 0.82843 | 0.80609 | -0.01083 |
| B  | 0.66072 | 0.97486 | 0.00704  |
| B  | 0.99464 | 0.97483 | 0.00701  |
| B  | 0.82948 | 0.14064 | -0.00339 |
| B  | 0.66064 | 0.64061 | 0.00407  |
| B  | 0.16010 | 0.14061 | -0.00339 |
| B  | 0.49565 | 0.80614 | -0.01082 |
| B  | 0.99494 | 0.30643 | 0.00701  |
| B  | 0.32815 | 0.97384 | 0.01479  |
| B  | 0.32926 | 0.47165 | -0.02206 |
| B  | 0.82815 | 0.97384 | 0.01479  |
| B  | 0.66143 | 0.30741 | 0.01479  |
| B  | 0.82926 | 0.47165 | -0.02206 |
| B  | 0.66032 | 0.80960 | -0.02206 |
| B  | 0.16143 | 0.30741 | 0.01479  |
| B  | 0.16032 | 0.80960 | -0.02206 |
| Li | 0.99479 | 0.64063 | 0.09628  |
| Li | 0.49479 | 0.64063 | 0.09628  |

Li<sub>2</sub>/BBP under an applied electric field of 0.25 V Å<sup>-1</sup>

|    |         |         |          |
|----|---------|---------|----------|
| B  | 0.49466 | 0.97481 | 0.00702  |
| B  | 0.99398 | 0.47503 | -0.01099 |
| B  | 0.32902 | 0.64063 | 0.00387  |
| B  | 0.32947 | 0.14063 | -0.00324 |
| B  | 0.66012 | 0.14062 | -0.00324 |
| B  | 0.49493 | 0.30644 | 0.00702  |
| B  | 0.32840 | 0.80620 | -0.01099 |
| B  | 0.82885 | 0.30643 | 0.00704  |
| B  | 0.16119 | 0.47506 | -0.01099 |
| B  | 0.66119 | 0.47506 | -0.01099 |
| B  | 0.16057 | 0.64062 | 0.00387  |
| B  | 0.99561 | 0.80623 | -0.01099 |
| B  | 0.32885 | 0.30643 | 0.00704  |
| B  | 0.16073 | 0.97483 | 0.00704  |
| B  | 0.49398 | 0.47503 | -0.01099 |
| B  | 0.82902 | 0.64063 | 0.00387  |
| B  | 0.82840 | 0.80620 | -0.01099 |
| B  | 0.66073 | 0.97483 | 0.00704  |
| B  | 0.99466 | 0.97481 | 0.00702  |
| B  | 0.82947 | 0.14063 | -0.00324 |
| B  | 0.66057 | 0.64062 | 0.00387  |
| B  | 0.16012 | 0.14062 | -0.00324 |
| B  | 0.49561 | 0.80623 | -0.01099 |
| B  | 0.99493 | 0.30644 | 0.00702  |
| B  | 0.32819 | 0.97379 | 0.01484  |
| B  | 0.32931 | 0.47156 | -0.02202 |
| B  | 0.82819 | 0.97379 | 0.01484  |
| B  | 0.66139 | 0.30746 | 0.01484  |
| B  | 0.82931 | 0.47156 | -0.02202 |
| B  | 0.66027 | 0.80969 | -0.02202 |
| B  | 0.16139 | 0.30746 | 0.01484  |
| B  | 0.16027 | 0.80969 | -0.02202 |
| Li | 0.99479 | 0.64063 | 0.09685  |
| Li | 0.49479 | 0.64063 | 0.09685  |

Li<sub>3</sub>/BBP under an applied electric field of 0.05 V Å<sup>-1</sup>

|    |         |         |          |
|----|---------|---------|----------|
| B  | 0.49464 | 0.97403 | 0.01186  |
| B  | 0.99356 | 0.47478 | -0.01387 |
| B  | 0.32906 | 0.64050 | -0.00096 |
| B  | 0.32997 | 0.14062 | 0.00148  |
| B  | 0.65962 | 0.14063 | 0.00148  |
| B  | 0.49494 | 0.30722 | 0.01186  |
| B  | 0.32770 | 0.80648 | -0.01386 |
| B  | 0.82778 | 0.30801 | 0.01306  |
| B  | 0.16206 | 0.47349 | -0.01494 |
| B  | 0.66188 | 0.47478 | -0.01386 |
| B  | 0.16064 | 0.64050 | -0.00096 |
| B  | 0.99603 | 0.80648 | -0.01387 |
| B  | 0.32806 | 0.30722 | 0.01185  |
| B  | 0.16180 | 0.97324 | 0.01306  |
| B  | 0.49467 | 0.47349 | -0.01494 |
| B  | 0.82894 | 0.64075 | -0.00096 |
| B  | 0.82752 | 0.80777 | -0.01494 |
| B  | 0.66153 | 0.97404 | 0.01185  |
| B  | 0.99516 | 0.97324 | 0.01307  |
| B  | 0.82992 | 0.14062 | 0.00015  |
| B  | 0.66052 | 0.64075 | -0.00096 |
| B  | 0.15966 | 0.14063 | 0.00015  |
| B  | 0.49492 | 0.80777 | -0.01494 |
| B  | 0.99442 | 0.30802 | 0.01307  |
| B  | 0.32946 | 0.97248 | 0.01970  |
| B  | 0.32968 | 0.47087 | -0.02440 |
| B  | 0.82827 | 0.97248 | 0.01970  |
| B  | 0.66012 | 0.30877 | 0.01970  |
| B  | 0.82966 | 0.47090 | -0.02851 |
| B  | 0.65991 | 0.81039 | -0.02440 |
| B  | 0.16131 | 0.30877 | 0.01970  |
| B  | 0.15993 | 0.81035 | -0.02851 |
| Li | 0.99479 | 0.64063 | 0.08812  |
| Li | 0.49479 | 0.64063 | 0.08813  |
| Li | 0.99479 | 0.14063 | 0.10869  |

Li<sub>3</sub>/BBP under an applied electric field of 0.10 V Å<sup>-1</sup>

|    |         |         |          |
|----|---------|---------|----------|
| B  | 0.49464 | 0.97404 | 0.01185  |
| B  | 0.99356 | 0.47478 | -0.01386 |
| B  | 0.32907 | 0.64050 | -0.00095 |
| B  | 0.32996 | 0.14062 | 0.00147  |
| B  | 0.65962 | 0.14063 | 0.00147  |
| B  | 0.49494 | 0.30722 | 0.01185  |
| B  | 0.32771 | 0.80648 | -0.01386 |
| B  | 0.82779 | 0.30801 | 0.01306  |
| B  | 0.16206 | 0.47349 | -0.01494 |
| B  | 0.66188 | 0.47478 | -0.01386 |
| B  | 0.16064 | 0.64050 | -0.00096 |
| B  | 0.99603 | 0.80648 | -0.01386 |
| B  | 0.32806 | 0.30721 | 0.01184  |
| B  | 0.16180 | 0.97325 | 0.01306  |
| B  | 0.49467 | 0.47349 | -0.01494 |
| B  | 0.82894 | 0.64075 | -0.00096 |
| B  | 0.82753 | 0.80776 | -0.01494 |
| B  | 0.66153 | 0.97404 | 0.01184  |
| B  | 0.99516 | 0.97324 | 0.01307  |
| B  | 0.82993 | 0.14062 | 0.00015  |
| B  | 0.66052 | 0.64076 | -0.00095 |
| B  | 0.15965 | 0.14063 | 0.00015  |
| B  | 0.49492 | 0.80776 | -0.01494 |
| B  | 0.99442 | 0.30801 | 0.01307  |
| B  | 0.32946 | 0.97249 | 0.01970  |
| B  | 0.32968 | 0.47087 | -0.02440 |
| B  | 0.82827 | 0.97249 | 0.01970  |
| B  | 0.66013 | 0.30877 | 0.01970  |
| B  | 0.82966 | 0.47091 | -0.02850 |
| B  | 0.65991 | 0.81038 | -0.02440 |
| B  | 0.16131 | 0.30877 | 0.01970  |
| B  | 0.15993 | 0.81035 | -0.02850 |
| Li | 0.99479 | 0.64063 | 0.08814  |
| Li | 0.49479 | 0.64063 | 0.08814  |
| Li | 0.99479 | 0.14063 | 0.10870  |

Li<sub>3</sub>/BBP under an applied electric field of 0.15 V Å<sup>-1</sup>

|    |         |         |          |
|----|---------|---------|----------|
| B  | 0.49456 | 0.97417 | 0.01133  |
| B  | 0.99357 | 0.47493 | -0.01360 |
| B  | 0.32910 | 0.64050 | -0.00055 |
| B  | 0.32999 | 0.14060 | 0.00082  |
| B  | 0.65960 | 0.14065 | 0.00082  |
| B  | 0.49503 | 0.30709 | 0.01133  |
| B  | 0.32787 | 0.80634 | -0.01352 |
| B  | 0.82799 | 0.30765 | 0.01244  |
| B  | 0.16182 | 0.47374 | -0.01463 |
| B  | 0.66172 | 0.47491 | -0.01352 |
| B  | 0.16058 | 0.64053 | -0.00063 |
| B  | 0.99601 | 0.80633 | -0.01360 |
| B  | 0.32814 | 0.30705 | 0.01123  |
| B  | 0.16159 | 0.97361 | 0.01244  |
| B  | 0.49462 | 0.47378 | -0.01460 |
| B  | 0.82900 | 0.64072 | -0.00063 |
| B  | 0.82777 | 0.80752 | -0.01463 |
| B  | 0.66145 | 0.97420 | 0.01123  |
| B  | 0.99499 | 0.97358 | 0.01259  |
| B  | 0.83002 | 0.14060 | -0.00042 |
| B  | 0.66049 | 0.64075 | -0.00055 |
| B  | 0.15957 | 0.14066 | -0.00042 |
| B  | 0.49497 | 0.80747 | -0.01460 |
| B  | 0.99460 | 0.30767 | 0.01259  |
| B  | 0.32940 | 0.97258 | 0.01934  |
| B  | 0.32965 | 0.47101 | -0.02389 |
| B  | 0.82831 | 0.97259 | 0.01937  |
| B  | 0.66018 | 0.30867 | 0.01934  |
| B  | 0.82963 | 0.47106 | -0.02813 |
| B  | 0.65993 | 0.81025 | -0.02389 |
| B  | 0.16127 | 0.30866 | 0.01937  |
| B  | 0.15996 | 0.81019 | -0.02813 |
| Li | 0.99479 | 0.64063 | 0.08930  |
| Li | 0.49479 | 0.64063 | 0.08938  |
| Li | 0.99479 | 0.14063 | 0.10889  |

Li<sub>3</sub>/BBP under an applied electric field of 0.20 V Å<sup>-1</sup>

|    |         |         |          |
|----|---------|---------|----------|
| B  | 0.49459 | 0.97414 | 0.01145  |
| B  | 0.99359 | 0.47485 | -0.01372 |
| B  | 0.32914 | 0.64052 | -0.00079 |
| B  | 0.33002 | 0.14062 | 0.00107  |
| B  | 0.65956 | 0.14063 | 0.00107  |
| B  | 0.49499 | 0.30712 | 0.01145  |
| B  | 0.32781 | 0.80642 | -0.01367 |
| B  | 0.82802 | 0.30772 | 0.01237  |
| B  | 0.16191 | 0.47360 | -0.01477 |
| B  | 0.66178 | 0.47484 | -0.01367 |
| B  | 0.16055 | 0.64053 | -0.00082 |
| B  | 0.99599 | 0.80640 | -0.01372 |
| B  | 0.32810 | 0.30711 | 0.01140  |
| B  | 0.16156 | 0.97354 | 0.01237  |
| B  | 0.49468 | 0.47362 | -0.01478 |
| B  | 0.82903 | 0.64073 | -0.00082 |
| B  | 0.82768 | 0.80765 | -0.01477 |
| B  | 0.66148 | 0.97415 | 0.01140  |
| B  | 0.99510 | 0.97353 | 0.01248  |
| B  | 0.82993 | 0.14062 | -0.00049 |
| B  | 0.66045 | 0.64074 | -0.00079 |
| B  | 0.15965 | 0.14064 | -0.00049 |
| B  | 0.49491 | 0.80763 | -0.01478 |
| B  | 0.99448 | 0.30772 | 0.01248  |
| B  | 0.32936 | 0.97258 | 0.01921  |
| B  | 0.32967 | 0.47091 | -0.02390 |
| B  | 0.82834 | 0.97258 | 0.01928  |
| B  | 0.66022 | 0.30867 | 0.01921  |
| B  | 0.82962 | 0.47103 | -0.02811 |
| B  | 0.65991 | 0.81035 | -0.02390 |
| B  | 0.16125 | 0.30868 | 0.01928  |
| B  | 0.15996 | 0.81023 | -0.02811 |
| Li | 0.99479 | 0.64063 | 0.08987  |
| Li | 0.49479 | 0.64063 | 0.08991  |
| Li | 0.99479 | 0.14063 | 0.10961  |

Li<sub>3</sub>/BBP under an applied electric field of 0.25 V Å<sup>-1</sup>

|    |         |         |          |
|----|---------|---------|----------|
| B  | 0.49459 | 0.97415 | 0.01134  |
| B  | 0.99359 | 0.47487 | -0.01368 |
| B  | 0.32916 | 0.64051 | -0.00076 |
| B  | 0.33004 | 0.14062 | 0.00095  |
| B  | 0.65954 | 0.14064 | 0.00095  |
| B  | 0.49499 | 0.30710 | 0.01134  |
| B  | 0.32783 | 0.80640 | -0.01363 |
| B  | 0.82807 | 0.30766 | 0.01228  |
| B  | 0.16188 | 0.47363 | -0.01476 |
| B  | 0.66176 | 0.47485 | -0.01363 |
| B  | 0.16054 | 0.64052 | -0.00080 |
| B  | 0.99599 | 0.80638 | -0.01368 |
| B  | 0.32811 | 0.30709 | 0.01129  |
| B  | 0.16152 | 0.97360 | 0.01228  |
| B  | 0.49467 | 0.47365 | -0.01477 |
| B  | 0.82904 | 0.64073 | -0.00080 |
| B  | 0.82770 | 0.80762 | -0.01476 |
| B  | 0.66147 | 0.97417 | 0.01129  |
| B  | 0.99509 | 0.97359 | 0.01239  |
| B  | 0.82994 | 0.14062 | -0.00059 |
| B  | 0.66043 | 0.64074 | -0.00076 |
| B  | 0.15965 | 0.14064 | -0.00059 |
| B  | 0.49491 | 0.80761 | -0.01477 |
| B  | 0.99450 | 0.30766 | 0.01239  |
| B  | 0.32935 | 0.97261 | 0.01907  |
| B  | 0.32966 | 0.47093 | -0.02387 |
| B  | 0.82832 | 0.97261 | 0.01914  |
| B  | 0.66023 | 0.30864 | 0.01907  |
| B  | 0.82961 | 0.47105 | -0.02806 |
| B  | 0.65993 | 0.81032 | -0.02387 |
| B  | 0.16126 | 0.30865 | 0.01914  |
| B  | 0.15997 | 0.81021 | -0.02806 |
| Li | 0.99479 | 0.64063 | 0.09034  |
| Li | 0.49479 | 0.64063 | 0.09038  |
| Li | 0.99479 | 0.14063 | 0.11003  |



Li<sub>4</sub>/BBP under an applied electric field of 0.05 V Å<sup>-1</sup>

|    |         |         |          |
|----|---------|---------|----------|
| B  | 0.49459 | 0.97079 | 0.02313  |
| B  | 0.99433 | 0.47044 | -0.03488 |
| B  | 0.32912 | 0.63601 | -0.00857 |
| B  | 0.32857 | 0.13856 | 0.00111  |
| B  | 0.65847 | 0.13858 | 0.00114  |
| B  | 0.49388 | 0.30822 | 0.00602  |
| B  | 0.33053 | 0.79904 | 0.01505  |
| B  | 0.82351 | 0.30819 | 0.00598  |
| B  | 0.16083 | 0.47042 | -0.03486 |
| B  | 0.66083 | 0.47042 | -0.03486 |
| B  | 0.16045 | 0.63601 | -0.00854 |
| B  | 0.99602 | 0.79903 | 0.01509  |
| B  | 0.32351 | 0.30819 | 0.00598  |
| B  | 0.16021 | 0.97079 | 0.02310  |
| B  | 0.49433 | 0.47044 | -0.03488 |
| B  | 0.82912 | 0.63601 | -0.00857 |
| B  | 0.83053 | 0.79904 | 0.01505  |
| B  | 0.66021 | 0.97079 | 0.02310  |
| B  | 0.99459 | 0.97079 | 0.02313  |
| B  | 0.82857 | 0.13856 | 0.00111  |
| B  | 0.66045 | 0.63601 | -0.00854 |
| B  | 0.15847 | 0.13858 | 0.00114  |
| B  | 0.49602 | 0.79903 | 0.01509  |
| B  | 0.99388 | 0.30822 | 0.00602  |
| B  | 0.32626 | 0.97308 | 0.00120  |
| B  | 0.32902 | 0.46755 | -0.04080 |
| B  | 0.82626 | 0.97308 | 0.00120  |
| B  | 0.65520 | 0.31519 | 0.02490  |
| B  | 0.82902 | 0.46755 | -0.04080 |
| B  | 0.66081 | 0.80396 | -0.00730 |
| B  | 0.15520 | 0.31519 | 0.02490  |
| B  | 0.16081 | 0.80396 | -0.00730 |
| Li | 1.01968 | 0.58622 | 0.08438  |
| Li | 0.51968 | 0.58622 | 0.08438  |
| Li | 0.98477 | 0.15603 | 0.10775  |
| Li | 0.48477 | 0.15603 | 0.10775  |

Li<sub>4</sub>/BBP under an applied electric field of 0.10 V Å<sup>-1</sup>

|    |         |         |          |
|----|---------|---------|----------|
| B  | 0.49459 | 0.97080 | 0.02311  |
| B  | 0.99433 | 0.47044 | -0.03487 |
| B  | 0.32912 | 0.63602 | -0.00857 |
| B  | 0.32857 | 0.13857 | 0.00113  |
| B  | 0.65846 | 0.13859 | 0.00116  |
| B  | 0.49388 | 0.30822 | 0.00605  |
| B  | 0.33055 | 0.79903 | 0.01501  |
| B  | 0.82352 | 0.30818 | 0.00600  |
| B  | 0.16083 | 0.47043 | -0.03485 |
| B  | 0.66083 | 0.47043 | -0.03485 |
| B  | 0.16044 | 0.63601 | -0.00855 |
| B  | 0.99602 | 0.79902 | 0.01505  |
| B  | 0.32352 | 0.30818 | 0.00600  |
| B  | 0.16020 | 0.97080 | 0.02308  |
| B  | 0.49433 | 0.47044 | -0.03487 |
| B  | 0.82912 | 0.63602 | -0.00857 |
| B  | 0.83055 | 0.79903 | 0.01501  |
| B  | 0.66020 | 0.97080 | 0.02308  |
| B  | 0.99459 | 0.97080 | 0.02311  |
| B  | 0.82857 | 0.13857 | 0.00113  |
| B  | 0.66044 | 0.63601 | -0.00855 |
| B  | 0.15846 | 0.13859 | 0.00116  |
| B  | 0.49602 | 0.79902 | 0.01505  |
| B  | 0.99388 | 0.30822 | 0.00605  |
| B  | 0.32626 | 0.97309 | 0.00120  |
| B  | 0.32902 | 0.46755 | -0.04079 |
| B  | 0.82626 | 0.97309 | 0.00120  |
| B  | 0.65520 | 0.31519 | 0.02491  |
| B  | 0.82902 | 0.46755 | -0.04079 |
| B  | 0.66081 | 0.80396 | -0.00732 |
| B  | 0.15520 | 0.31519 | 0.02491  |
| B  | 0.16081 | 0.80396 | -0.00732 |
| Li | 1.01966 | 0.58624 | 0.08439  |
| Li | 0.51966 | 0.58624 | 0.08439  |
| Li | 0.98479 | 0.15599 | 0.10777  |
| Li | 0.48479 | 0.15599 | 0.10777  |

Li<sub>4</sub>/BBP under an applied electric field of 0.15 V Å<sup>-1</sup>

|    |         |         |          |
|----|---------|---------|----------|
| B  | 0.49452 | 0.97106 | 0.02171  |
| B  | 0.99431 | 0.47034 | -0.03448 |
| B  | 0.32923 | 0.63595 | -0.00840 |
| B  | 0.32850 | 0.13882 | 0.00125  |
| B  | 0.65828 | 0.13882 | 0.00126  |
| B  | 0.49382 | 0.30831 | 0.00691  |
| B  | 0.33043 | 0.79925 | 0.01394  |
| B  | 0.82348 | 0.30830 | 0.00688  |
| B  | 0.16094 | 0.47034 | -0.03445 |
| B  | 0.66094 | 0.47034 | -0.03445 |
| B  | 0.16041 | 0.63594 | -0.00839 |
| B  | 0.99592 | 0.79925 | 0.01395  |
| B  | 0.32348 | 0.30830 | 0.00688  |
| B  | 0.16002 | 0.97106 | 0.02172  |
| B  | 0.49431 | 0.47034 | -0.03448 |
| B  | 0.82923 | 0.63595 | -0.00840 |
| B  | 0.83043 | 0.79925 | 0.01394  |
| B  | 0.66002 | 0.97106 | 0.02172  |
| B  | 0.99452 | 0.97106 | 0.02171  |
| B  | 0.82850 | 0.13882 | 0.00125  |
| B  | 0.66041 | 0.63594 | -0.00839 |
| B  | 0.15828 | 0.13882 | 0.00126  |
| B  | 0.49592 | 0.79925 | 0.01395  |
| B  | 0.99382 | 0.30831 | 0.00691  |
| B  | 0.32619 | 0.97321 | 0.00133  |
| B  | 0.32915 | 0.46732 | -0.04046 |
| B  | 0.82619 | 0.97321 | 0.00133  |
| B  | 0.65520 | 0.31519 | 0.02514  |
| B  | 0.82915 | 0.46732 | -0.04046 |
| B  | 0.66084 | 0.80390 | -0.00799 |
| B  | 0.15520 | 0.31519 | 0.02514  |
| B  | 0.16084 | 0.80390 | -0.00799 |
| Li | 1.01929 | 0.58697 | 0.08520  |
| Li | 0.51929 | 0.58697 | 0.08520  |
| Li | 0.98573 | 0.15411 | 0.10879  |
| Li | 0.48573 | 0.15411 | 0.10879  |

Li<sub>4</sub>/BBP under an applied electric field of 0.20 V Å<sup>-1</sup>

|    |         |         |          |
|----|---------|---------|----------|
| B  | 0.49452 | 0.97117 | 0.02132  |
| B  | 0.99423 | 0.47037 | -0.03434 |
| B  | 0.32926 | 0.63591 | -0.00828 |
| B  | 0.32853 | 0.13884 | 0.00128  |
| B  | 0.65823 | 0.13885 | 0.00129  |
| B  | 0.49373 | 0.30835 | 0.00717  |
| B  | 0.33044 | 0.79929 | 0.01355  |
| B  | 0.82354 | 0.30832 | 0.00714  |
| B  | 0.16098 | 0.47037 | -0.03431 |
| B  | 0.66098 | 0.47037 | -0.03431 |
| B  | 0.16041 | 0.63591 | -0.00827 |
| B  | 0.99586 | 0.79929 | 0.01356  |
| B  | 0.32354 | 0.30832 | 0.00714  |
| B  | 0.15992 | 0.97116 | 0.02131  |
| B  | 0.49423 | 0.47037 | -0.03434 |
| B  | 0.82926 | 0.63591 | -0.00828 |
| B  | 0.83044 | 0.79929 | 0.01355  |
| B  | 0.65992 | 0.97116 | 0.02131  |
| B  | 0.99452 | 0.97117 | 0.02132  |
| B  | 0.82853 | 0.13884 | 0.00128  |
| B  | 0.66041 | 0.63591 | -0.00827 |
| B  | 0.15823 | 0.13885 | 0.00129  |
| B  | 0.49586 | 0.79929 | 0.01356  |
| B  | 0.99373 | 0.30835 | 0.00717  |
| B  | 0.32616 | 0.97327 | 0.00135  |
| B  | 0.32919 | 0.46723 | -0.04057 |
| B  | 0.82616 | 0.97327 | 0.00135  |
| B  | 0.65523 | 0.31513 | 0.02493  |
| B  | 0.82919 | 0.46723 | -0.04057 |
| B  | 0.66086 | 0.80386 | -0.00810 |
| B  | 0.15523 | 0.31513 | 0.02493  |
| B  | 0.16086 | 0.80386 | -0.00810 |
| Li | 1.01916 | 0.58722 | 0.08557  |
| Li | 0.51916 | 0.58722 | 0.08557  |
| Li | 0.98599 | 0.15359 | 0.10931  |
| Li | 0.48599 | 0.15359 | 0.10931  |

Li<sub>4</sub>/BBP under an applied electric field of 0.25 V Å<sup>-1</sup>

|    |         |         |          |
|----|---------|---------|----------|
| B  | 0.49454 | 0.97125 | 0.02097  |
| B  | 0.99415 | 0.47040 | -0.03419 |
| B  | 0.32928 | 0.63589 | -0.00819 |
| B  | 0.32854 | 0.13887 | 0.00132  |
| B  | 0.65819 | 0.13888 | 0.00133  |
| B  | 0.49365 | 0.30833 | 0.00743  |
| B  | 0.33045 | 0.79934 | 0.01312  |
| B  | 0.82365 | 0.30830 | 0.00740  |
| B  | 0.16105 | 0.47039 | -0.03417 |
| B  | 0.66105 | 0.47039 | -0.03417 |
| B  | 0.16041 | 0.63589 | -0.00817 |
| B  | 0.99581 | 0.79934 | 0.01313  |
| B  | 0.32365 | 0.30830 | 0.00740  |
| B  | 0.15980 | 0.97125 | 0.02096  |
| B  | 0.49415 | 0.47040 | -0.03419 |
| B  | 0.82928 | 0.63589 | -0.00819 |
| B  | 0.83045 | 0.79934 | 0.01312  |
| B  | 0.65980 | 0.97125 | 0.02096  |
| B  | 0.99454 | 0.97125 | 0.02097  |
| B  | 0.82854 | 0.13887 | 0.00132  |
| B  | 0.66041 | 0.63589 | -0.00817 |
| B  | 0.15819 | 0.13888 | 0.00133  |
| B  | 0.49581 | 0.79934 | 0.01313  |
| B  | 0.99365 | 0.30833 | 0.00743  |
| B  | 0.32613 | 0.97334 | 0.00137  |
| B  | 0.32925 | 0.46711 | -0.04071 |
| B  | 0.82613 | 0.97334 | 0.00137  |
| B  | 0.65525 | 0.31509 | 0.02470  |
| B  | 0.82925 | 0.46711 | -0.04071 |
| B  | 0.66087 | 0.80383 | -0.00820 |
| B  | 0.15525 | 0.31509 | 0.02470  |
| B  | 0.16087 | 0.80383 | -0.00820 |
| Li | 1.01901 | 0.58753 | 0.08594  |
| Li | 0.51901 | 0.58753 | 0.08594  |
| Li | 0.98624 | 0.15310 | 0.10987  |
| Li | 0.48624 | 0.15310 | 0.10987  |
